# Supplementary material for: Glucose oxidase, horseradish peroxidase and phenothiazine dyes-co-adsorbed carbon felt-based amperometric flow-biosensor for glucose
Source: Royal Society of Chemistry journal article supplement (doi:10.1039/d4ay01028k), 2024-01-01
Supplement: d4ay01028k1.pdf [file d4ay01028k1.pdf]

Electronic Supplementary Information:

## **Glucose oxidase, horseradish peroxidase and phenothiazine dyes-coadsorbed carbon felt-based amperometric flow-biosensor for glucose**

Zeting Jiao,<sup>a</sup> Lichuan Kuang,<sup>a</sup> Masahito Komori,<sup>a</sup> Masaki Hirono,<sup>b</sup> Ryouta Komuro,<sup>b</sup> Yue Wang,<sup>c</sup>  
and Yasushi Hasebe <sup>\*a,b</sup>

*a, Department of Life Science and Green Chemistry, Graduate School of Engineering, Saitama Institute of Technology, 1690 Fukaya, Saitama 369-0293, Japan.*

*b, Department of Life Science and Green Chemistry, Faculty of Engineering, Saitama Institute of Technology, 1690 Fukaya, Saitama 369-0293, Japan.*

*c, School of Chemical Engineering, University of Science and Technology LiaoNing, Anshan, LiaoNing 114501, China.*

Email: [hasebe@sit.ac.jp](mailto:hasebe@sit.ac.jp)

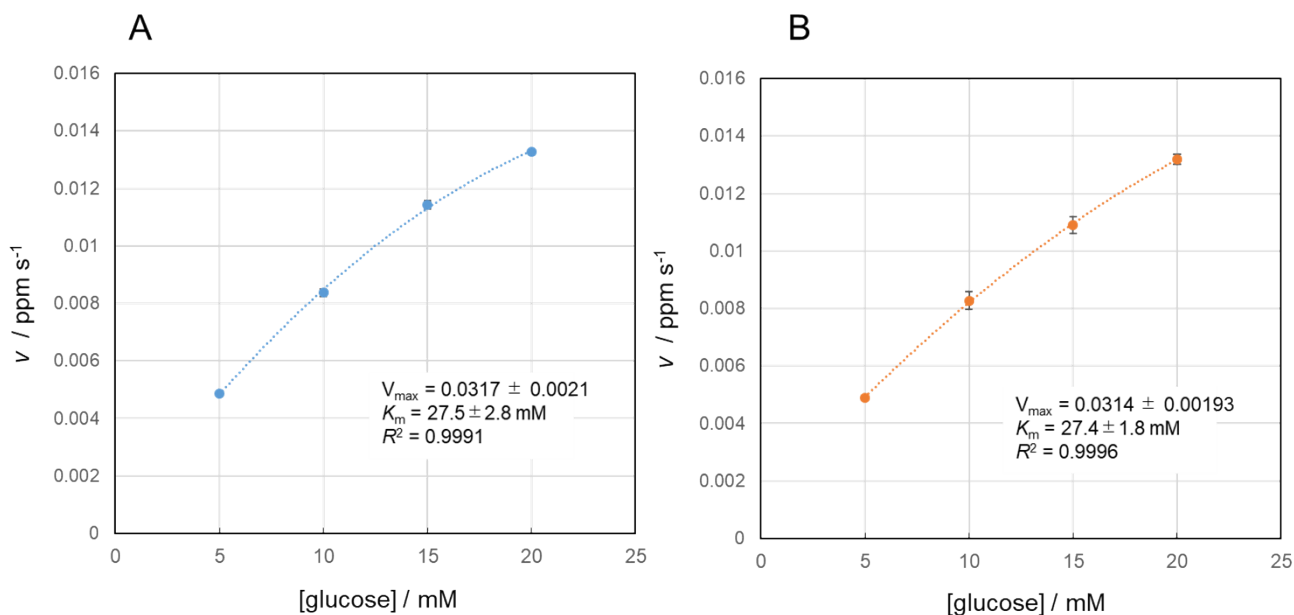

**Fig. S1** Michaelis-Menten plots for the oxidation of glucose catalyzed by GOx without (panel A) and with the US-pretreatment (the US irradiation for 5 min) (panel B). The velocity ( $v$ ) is an initial rate (400 s) of the decrease in dissolved oxygen measured by the  $\text{O}_2$  meter after the addition of glucose in the GOx-dissolving air-saturate 0.1 M BR buffer (pH 5.0) with gentle stirring.  $[\text{GOx}] = 0.5 \mu\text{g/mL}$ . The values of  $V_{\max}$  and  $K_m$  were calculated by the OriginPro software.

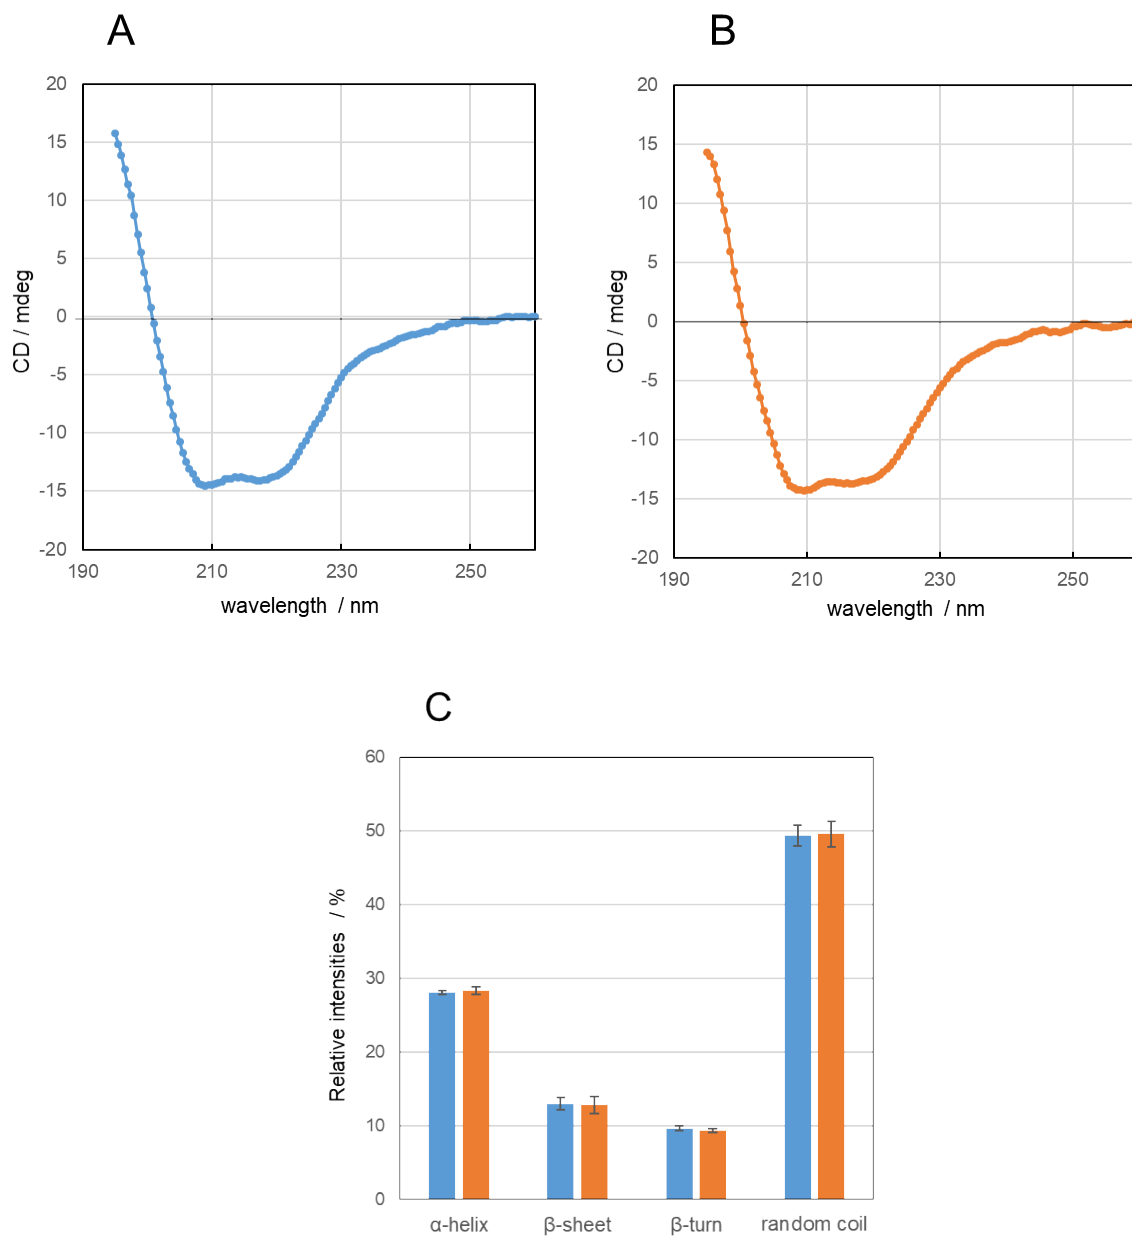

**Fig. S2** (A and B) Circular dichroism (CD) spectra of GOx in aqueous solution without (panel A) and with the US-pretreatment (the US irradiation for 5 min) (panel B) at 25 °C. [GOx] = 1.5  $\mu$ M. (C) Relative amounts of  $\alpha$ -helix,  $\beta$ -sheet,  $\beta$ -turn and random coil of GOx without (blue) and with the US-pretreatment (the US irradiation for 5 min) (orange). CD measurement conditions are same in panel A and B. The values are the average of three different GOx samples.

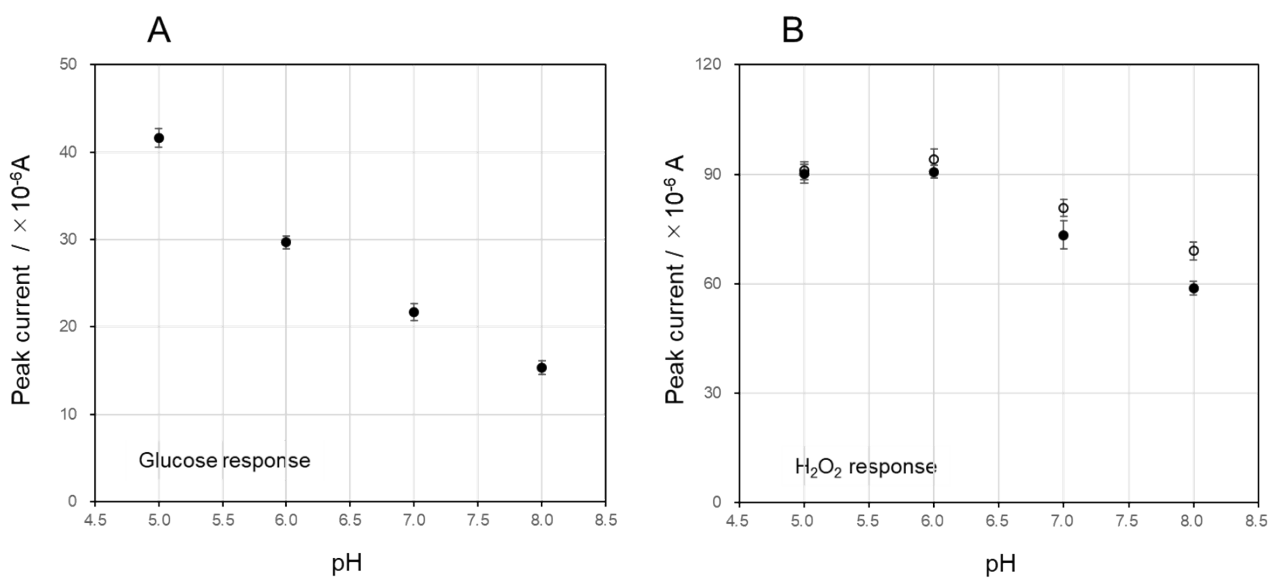

**Fig. S3** (A) Effect of carrier pH upon the cathodic peak current responses to 10 mM glucose obtained by the GOx/MB-CF-reactor and HRP/TN-CF-detector-combined amperometric flow-biosensor for glucose. (B) Effect of carrier pH on the cathodic peak current responses to 30  $\mu$ M H<sub>2</sub>O<sub>2</sub> obtained by the GOx/MB-CF-reactor and HRP/HRP-CF-detector combined system (●), and that obtained by only HRP/TN-CF-based H<sub>2</sub>O<sub>2</sub> detector (○) (without GOx/MB-CF-reactor). The operational conditions are the same in Fig. 2A. Plots are the average of three individual sensor's responses.

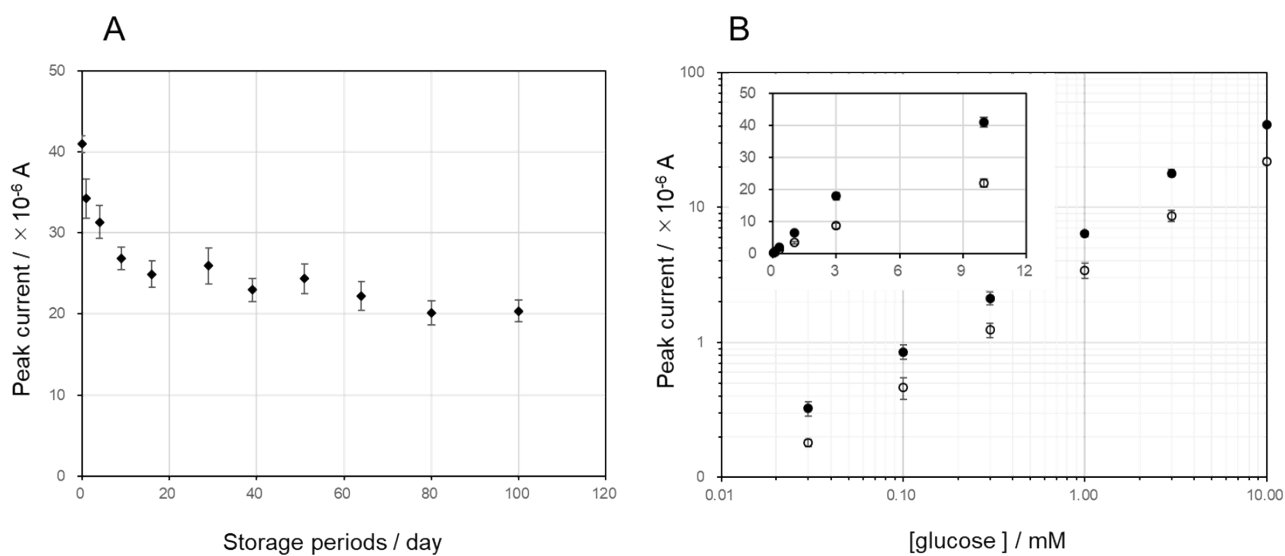

**Fig. S4** (A) Long-term storage stability of the GOx/MB-CF-based reactor. Plots are the average of the peak current responses for 10 mM glucose obtained by three different GOx/MB-CF-reactors. The GOx/MB-CF was stored in 0.1 M BR buffer (pH 5.0) in refrigerator at 4 °C. The HRP/TN-CF-detector was freshly prepared on each measurement day. (B) Comparison of the calibration curves obtained at initial day (●) and that obtained after 100 days' storage (○).
